# Supplementary material
Source: PubMed Central journal article supplement (PMC2453083)

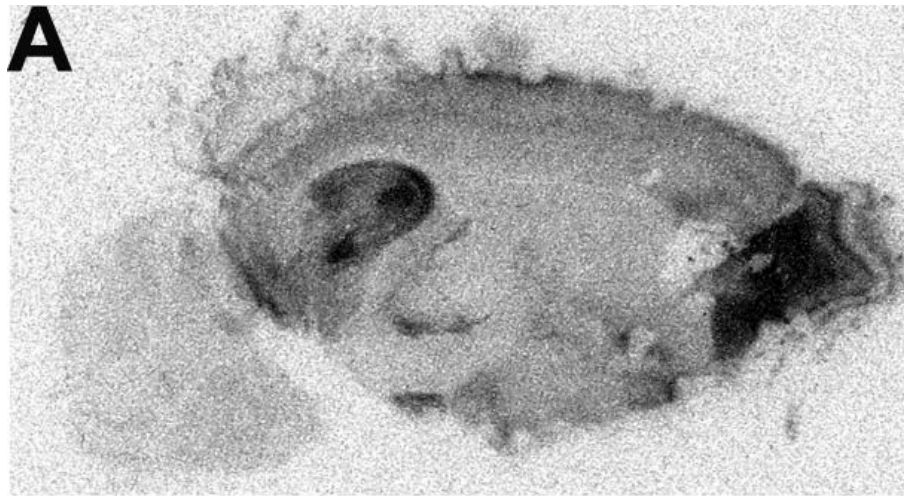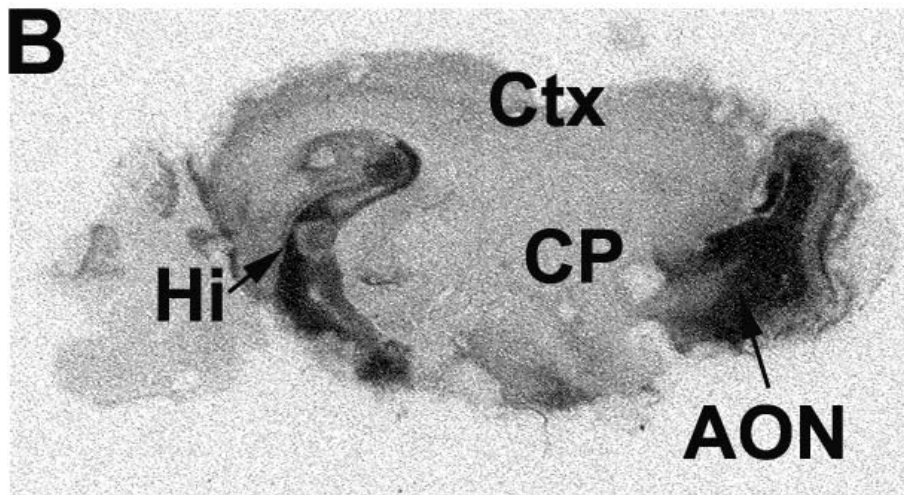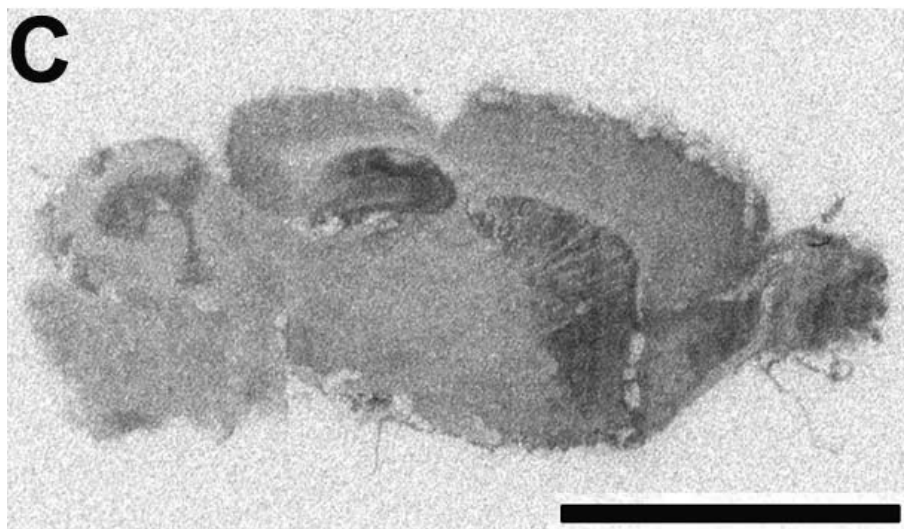

Supplement: en.2007-1710_1.pdf [file en.2007-1710_1.pdf]

## *Oxtr*<sup>FB/FB</sup> Males & Females

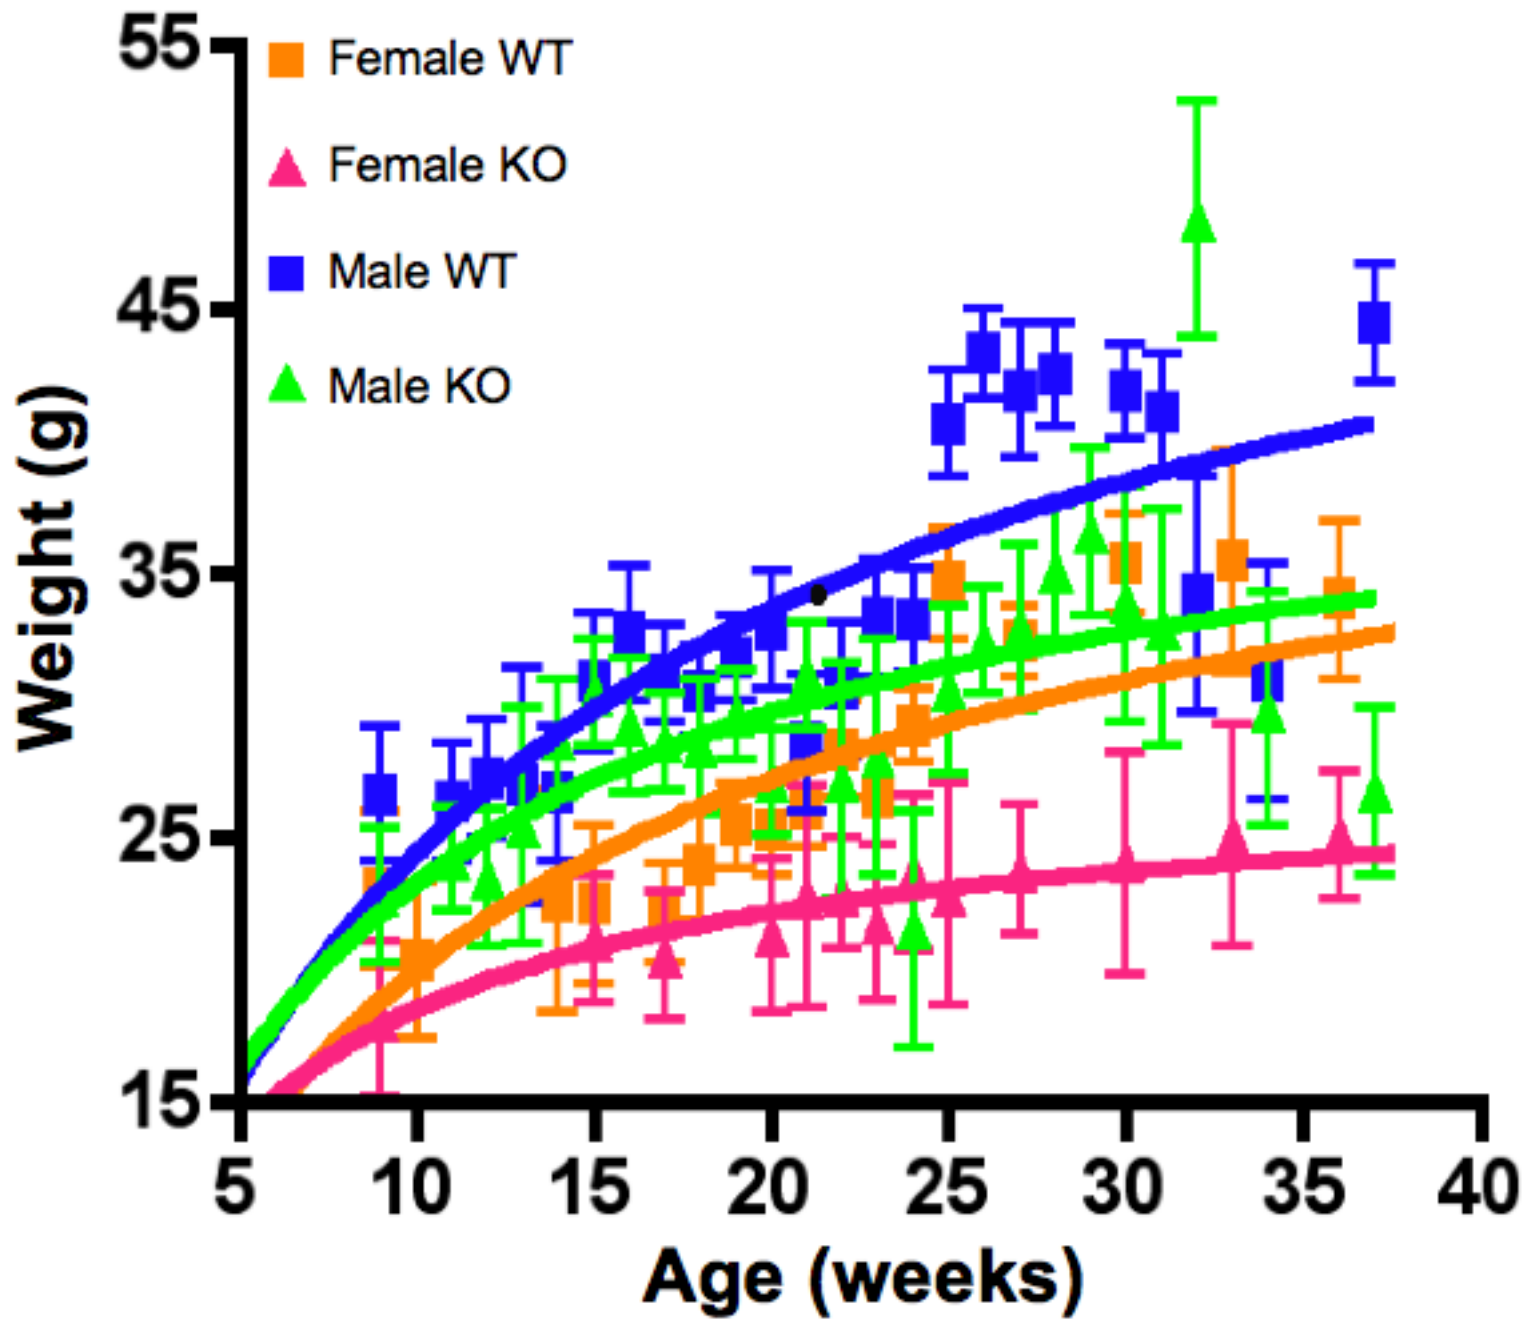

Supplement: en.2007-1710_2.pdf [file en.2007-1710_2.pdf]
